# Supplementary material for: Synergistic effect of ionic liquid-doped spiro-OMeTAD: simultaneous management of energy level alignment and interfacial traps in perovskite solar cells
Source: Royal Society of Chemistry journal article supplement (doi:10.1039/d4qi01459f), 2024-01-01
Supplement: d4qi01459f1.pdf [file d4qi01459f1.pdf]

## Supporting Information for

Qingshui Zheng<sup>§ a</sup>, Fengxian Cao<sup>§ a</sup>, Yuhong Wang<sup>a</sup>, Anling Tong<sup>a</sup>, Shibo Wang<sup>a</sup>, Pengxu Chen<sup>a</sup>, Zeyuan Zhao<sup>a</sup>, Yang Wang<sup>a</sup>, Weihai Sun<sup>\* a</sup>, Weichun Pan<sup>\* a</sup>, Yunlong Li<sup>\* b</sup>, and Jihuai Wu<sup>\* a</sup>

<sup>a</sup> *Engineering Research Center of Environment-Friendly Functional Materials, Ministry of Education; Institute of Materials Physical Chemistry, Huaqiao University, Xiamen 361021, China.*

<sup>b</sup> *Shenzhen Institute of Advanced Technology Chinese Academy of Sciences, Shenzhen, China.*

**This file includes:**

**Experimental Section**

**Figures S1~S12**

**Tables S1~S3**

---

\* Corresponding authors: E-mail: [sunweihai@hqu.edu.cn](mailto:sunweihai@hqu.edu.cn); [weichun.pan@outlook.com](mailto:weichun.pan@outlook.com); [jhwu@hqu.edu.cn](mailto:jhwu@hqu.edu.cn); [yl.li2@siat.ac.cn](mailto:yl.li2@siat.ac.cn).

§ These authors contributed equally to this work.

## **Experimental section**

### ***Materials***

All reagents were used as received without further purification. The SnO<sub>2</sub> aqueous colloidal precursor (tin (IV) oxide 15% in H<sub>2</sub>O colloidal dispersion, Alfa Aesar). PbI<sub>2</sub> (99.999%, Advanced Election Technology Co. Ltd), FAI (99.999%, Advanced Election Technology Co., Ltd), MAI (≥99.5%, Xi'an Polymer Light Technology Corp.), Butylamine (99.5%, Xi'an Polymer Light Technology Corp), MACl (99.5%, Xi'an Polymer Light Technology Corp), 2, 2', 7, 7'-Tetrakis[N, N-di(4-methoxyphenyl)amino]-9, 9'-spirobifluorene (Spiro-OMeTAD, ≥99%, Shenzhen Feiming Science and Technology Co., Ltd), Isopropanol (IPA, 99.5%, Sigma-Aldrich), dimethylformamide (DMF, >99.9%, Sigma-Aldrich), dimethyl sulfoxide (DMSO, >99.9%, Sigma-Aldrich), Bis (trifluoromethane) sulfonimide lithium salt (Li-TFSI, ≥99%, Sigma-Aldrich), 4-tert-Butylpyridine(4-tBP, 98%, Sigma-Aldrich). ITO substrate (10 Ω, Advanced Election Technology Co. Ltd).

### ***Synthesis of butylamine bis(trifluoromethyl)sulfonylimine (BATFSI) ionic liquids***

Butylamine (0.268 g, 3.67 mmol) and HTFSI (1.03 g, 3.49 mmol) were mixed and stirred for 12 h to obtain the resulting ionic liquid (1.30 g). The ionic liquid was used after evaporation under reduced pressure using a rotary evaporator.

### ***Perovskite Solar Cells Preparation***

ITO substrates were sequentially washed with deionized water, ethyl alcohol, and then again with ethyl alcohol in an ultrasonic bath for 30 min, and which was further treated with UV/ozone (UVO) for 20 min before use. The SnO<sub>2</sub> film was spin-coated onto the ITO using a commercial SnO<sub>2</sub> colloidal solution (3% diluted with water) at 3500 rpm for 25 s, and then annealed at 150°C for 30 min in ambient air. A 30 μL PbI<sub>2</sub> solution (1.5 M mol/L PbI<sub>2</sub> in DMF:DMSO = 9:1) was spin-coated onto SnO<sub>2</sub> at 1500 rpm

for 30 s, and then annealed at 70°C for 1 min. Subsequently, a 30  $\mu$ L organic salt solution (0.468 M mol/L FAI: 0.41 M mol/L MAI: 0.133 M mol/L MACl in IPA) was spin-coated at 2000 rpm for 30 s and then annealed with a two-step program: at 30°C for 5 min and at 150°C for 15 min, respectively. The hole transfer materials were deposited by preparing a Spiro-OMeTAD chlorobenzene solution (750 mg/mL) and mixing it with 28.8  $\mu$ L 4-tBP, 17.5  $\mu$ L Li-TFSI (520 mg/mL in acetonitrile). The BATFSI solution (10 mg/mL in IPA) was added to the hole transfer materials at volume ratios of 1%, 2%, and 3%, respectively. The Spiro-OMeTAD film was spin-coated onto the perovskite film at 1,000 rpm for 10 s and then at 3,500 rpm for 20 s. Finally, 100 nm thick silver layers were deposited using a thermal evaporator.

### ***Characterization***

The Scan electron microscope pictures were taken with FE-SEM (JSM-7610F Plus, Japan). The surface roughness and contact potential difference of the HTL were measured using high-resolution atomic force microscopy (AFM) on a Bruker Multimode-8 system from the USA. An intelligent mode with a scan rate of 0.977 Hz was applied. X-ray photoelectron spectra (XPS) and ultraviolet photoelectron spectroscopy (UPS) were measured by X-ray photoelectron spectrometer (Thermo Fisher Scientific K-Alpha<sup>+</sup>, U.K.). UV-vis absorption spectra were measured by UV-vis spectrometer (PerkinElmer Lambda 950, USA). The ESR measurements were carried out with an X-band spectrometer (JEOL RESONANCE JES-FA200, Japan). The conductivity of the HTL was measured by the four-point probe (Tektronix 4200A-SCS, China). X-ray diffraction (XRD) spectra were tested by X-ray powder diffractometer (Smart Lab, Japan). The Time-resolved fluorescence spectroscopy (TRPL) spectra and steady-state PL were measured by Multifunctional fluorescence spectrum measurement system (OmniFluo-510HQ, China) using an excitation wavelength of 350 nm. The photocurrent density-

voltage (J–V) curves were measured with a light intensity of  $100 \text{ mW}\cdot\text{cm}^{-2}$  (AM 1.5G) which was calibrated by a silicon reference cell certificated by NREL. The Electrochemical Workstation (China) recorded impedance spectroscopy with a bias voltage of 0 V and the Z-View program calculated and analyzed the data. The EQE spectra were obtained using a quantum efficiency measurement system (RR0121013, QE-R, Eclitech, China). Long-term stability tests were measured with an RH of 35% and a temperature of 25 °C.

## Figure S1~S12

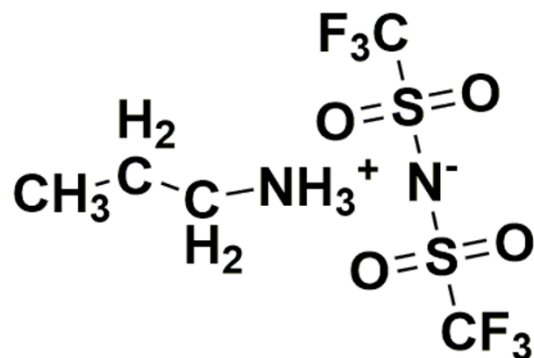

**Figure S1.** Chemical structure of butylamine bis(trifluoromethyl)sulfonylimine (BATFSI)

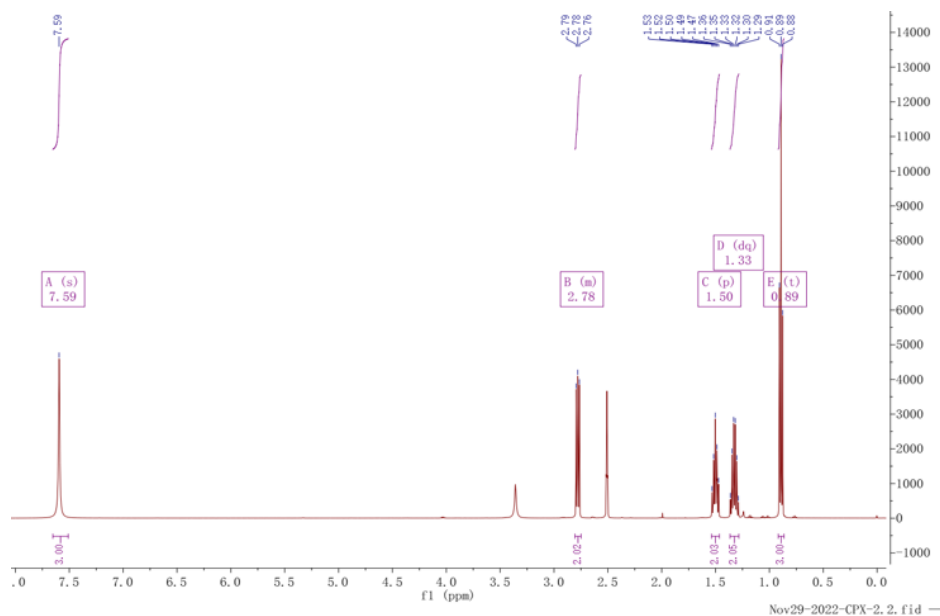

**Figure S2.**  $^1\text{H}$  NMR (500 MHz,  $\text{DMSO-}d_6$ )  $\delta$  7.59 (s, 3H), 2.81 – 2.75 (m, 2H), 1.50 (p,  $J = 7.5$  Hz, 2H), 1.33 (dq,  $J = 14.6, 7.3$  Hz, 2H), 0.89 (t,  $J = 7.4$  Hz, 3H) of BATFSI.

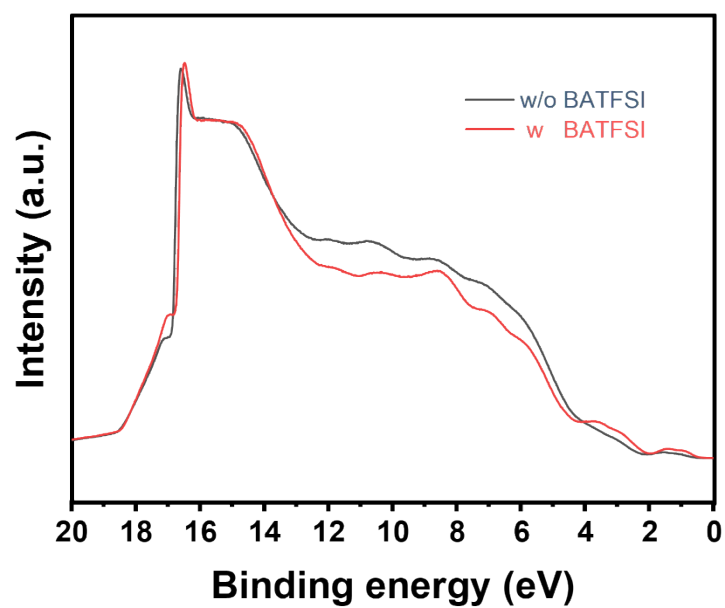

**Figure. S3** The UPS broad spectra of PVK films.

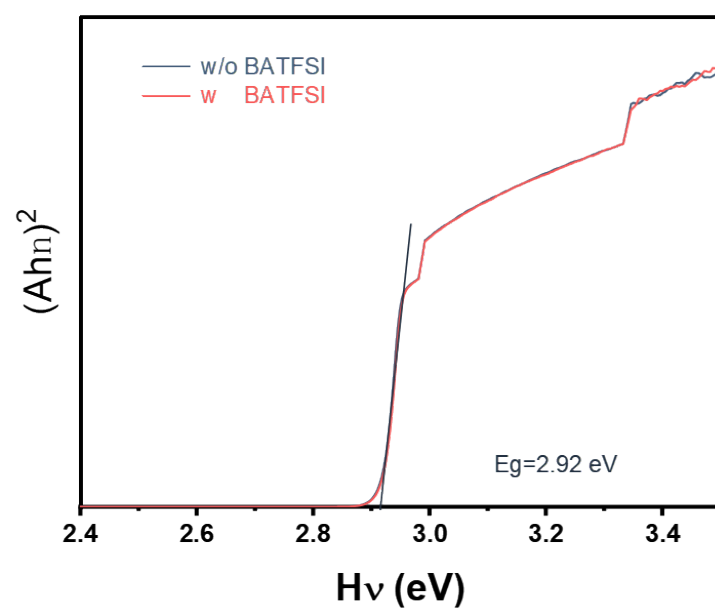

**Figure S4.** Tauc plots were used to estimate the optical bandgap ( $E_g$ ) of the spiro-OMeTAD with and without BATFSI from absorption spectra.

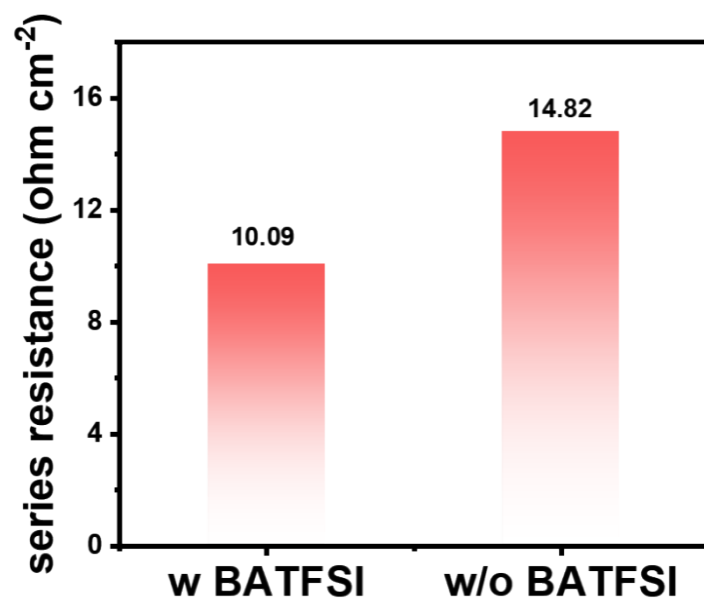

**Figure S5.** Four-point probe conductivity measurements with structures of ITO/HTL (with LiTFSI doped or BATFSI and LiTFSI co-doped)/Ag.

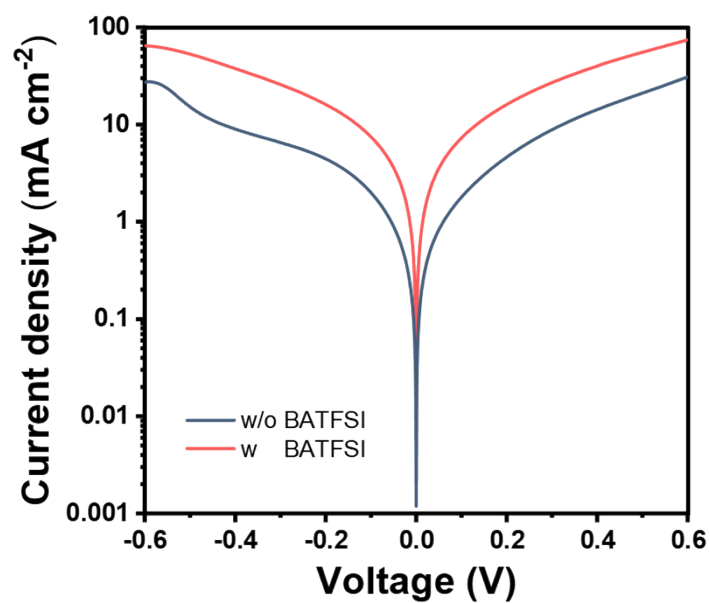

**Figure S6.** Tafel plots with structures of ITO/HTL (with LiTFSI doped or BATFSI and LiTFSI co-doped)/Ag.

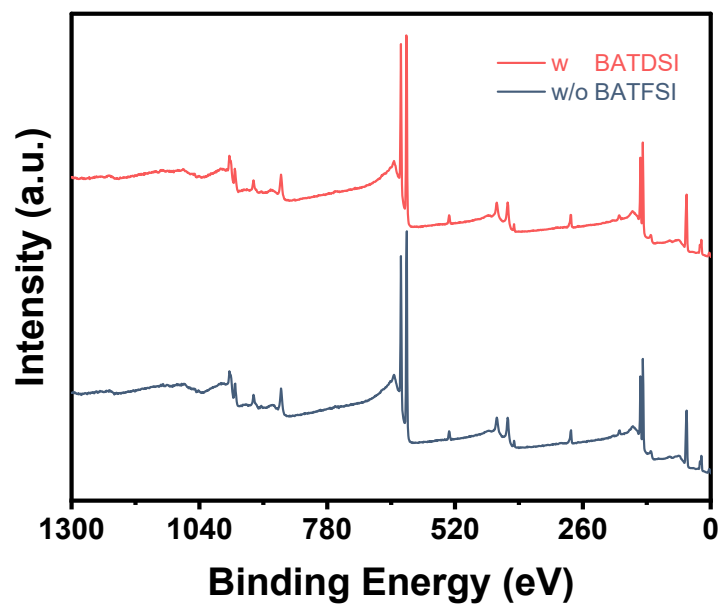

**Figure S7.** The XPS broad spectra of the PVK/HTL samples were rinsed with chlorobenzene.

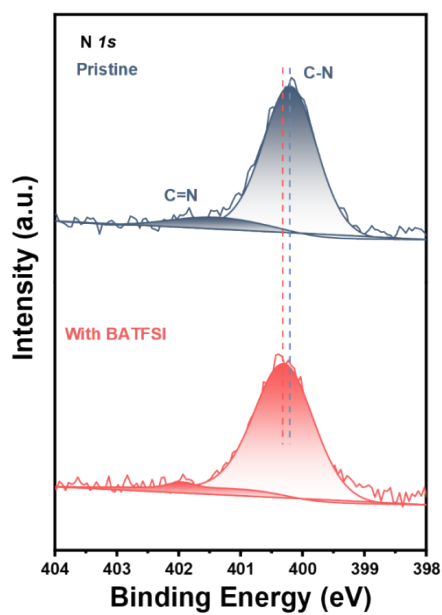

**Figure S8.** XPS measurements of the feature peak of N 1s for perovskites after removing the HTLs with and without BATFSI.



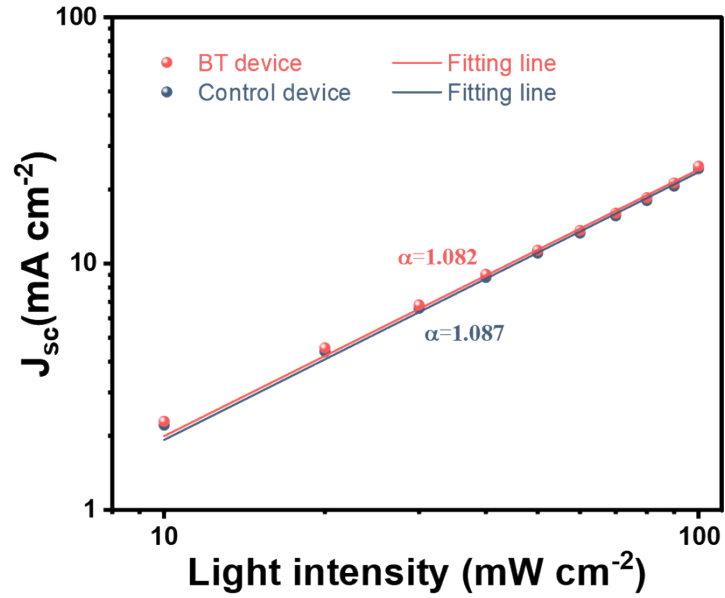

**Figure S9.** Light-dependent  $J_{SC}$  measurements of the device with and without BATFSI.

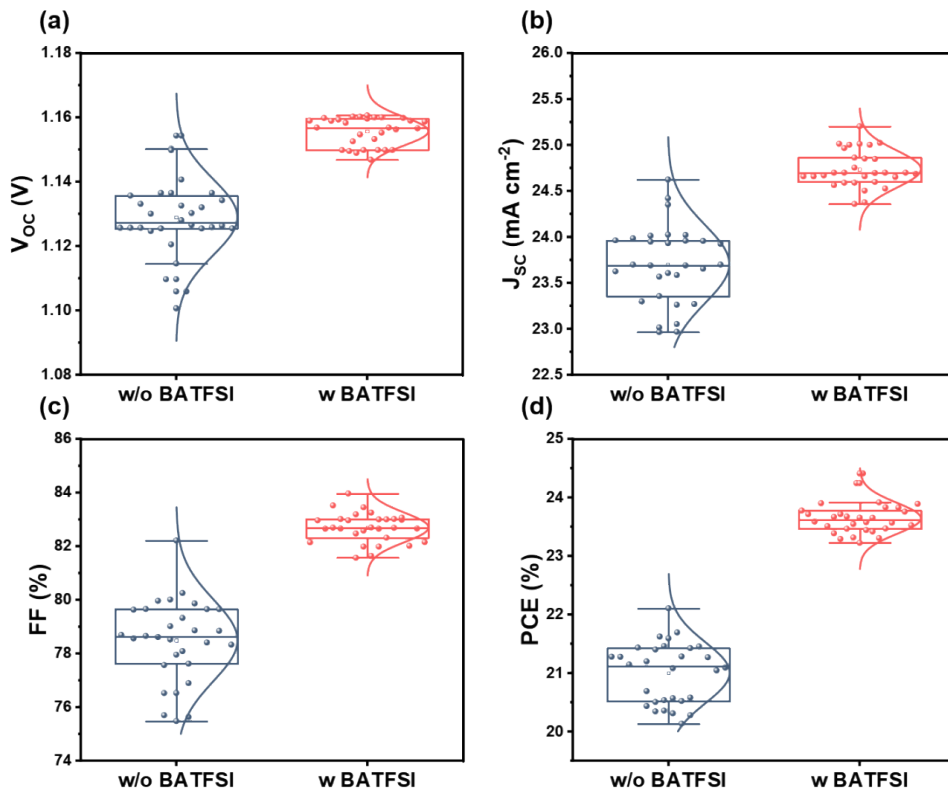

**Figure S10.** The statistics of (a)  $V_{OC}$ , (b)  $J_{SC}$ , (c) FF and (d) PCE distribution for devices without and with BATFSI.

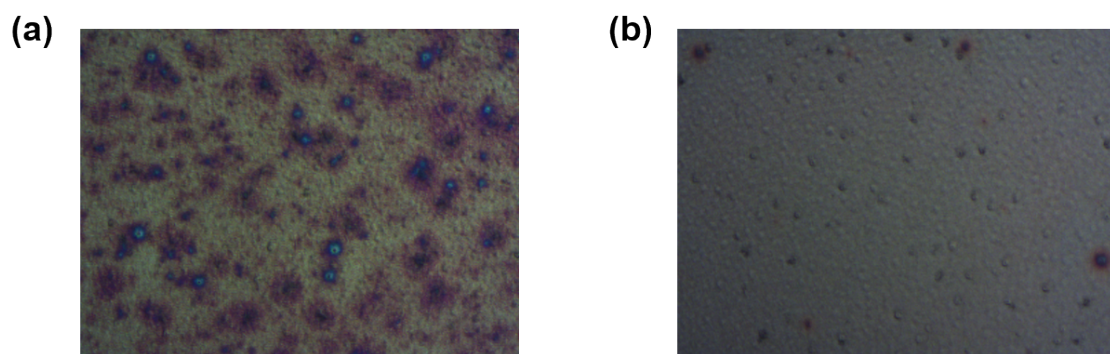

**Figure S11.** Optical micrographs of the PVK/HTL films of (a) LiTFSI doped and (b) BATFSI and LiTFSI co-doped.

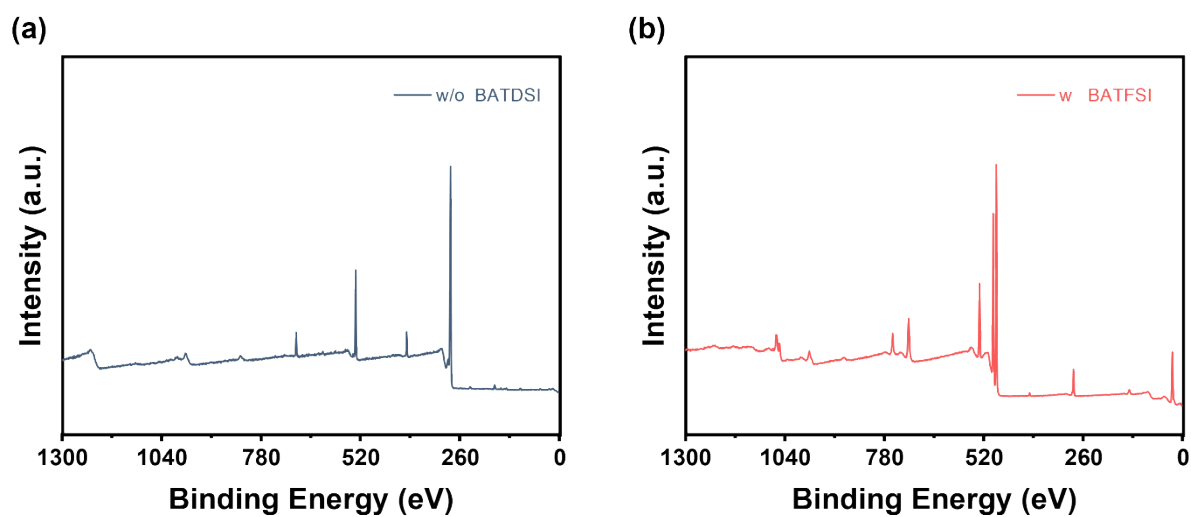

**Figure S12.** The XPS broad spectra of the PVK/HTL samples were rinsed with chlorobenzene, after one month.

## Tables S1~S3

**Table S1.** Comparison of some optoelectronic parameters between spiro-OMeTAD with and without BATFSI.

| spiro-OMeTAD | $E_{\text{cutoff}}$<br>(eV) | $E_{\text{onset}}$<br>(eV) | $E_{\text{F}}$<br>(eV) | $E_{\text{VB}}$<br>(eV) | $E_{\text{CB}}$<br>(eV) | $E_{\text{g}}$<br>(eV) |
|--------------|-----------------------------|----------------------------|------------------------|-------------------------|-------------------------|------------------------|
| w/o BATFSI   | 16.93                       | 0.55                       | -4.29                  | -4.84                   | -1.92                   | 2.92                   |
| w BATFSI     | 16.77                       | 0.45                       | -4.45                  | -4.90                   | -1.98                   | 2.92                   |

**Table S2.** Photovoltaic data of PSCs based on HTLs doped with different concentrations of BATFSI.

| Sample | $V_{\text{OC}}$ (V) | $J_{\text{SC}}$ (mA cm <sup>-2</sup> ) | FF (%) | PCE (%) |
|--------|---------------------|----------------------------------------|--------|---------|
| 0%     | 1.101               | 24.42                                  | 82.22  | 22.11   |
| 1.0%   | 1.150               | 25.00                                  | 83.19  | 23.92   |
| 2.0%   | 1.161               | 25.26                                  | 83.45  | 24.47   |
| 3.0%   | 1.160               | 25.02                                  | 83.52  | 24.24   |

**Table S3.** Photovoltaic performance of the solar cells using different HTLs.

| Sample     | $V_{\text{OC}}$ (V) | $J_{\text{SC}}$ (mA cm <sup>-2</sup> ) | FF (%)     | PCE (%)    |            |
|------------|---------------------|----------------------------------------|------------|------------|------------|
| w/o BATFSI | Statistics          | 1.129±0.005                            | 23.68±0.23 | 78.49±0.28 | 20.98±0.28 |
|            | Champion            | 1.101                                  | 24.42      | 82.22      | 22.11      |
| w/ BATFSI  | Statistics          | 1.156±0.005                            | 24.74±0.18 | 82.70±0.83 | 23.64±0.30 |
|            | Champion            | 1.161                                  | 25.26      | 83.45      | 24.47      |
